# Supplementary material for: Drosophila females trade off good nutrition with high quality oviposition sites when choosing foods
Source: Oxford University Press journal article supplement (doi:10.1242/jeb.142257), 2016-01-01
Supplement: jeb142257supp.pdf [file jeb142257supp.pdf]

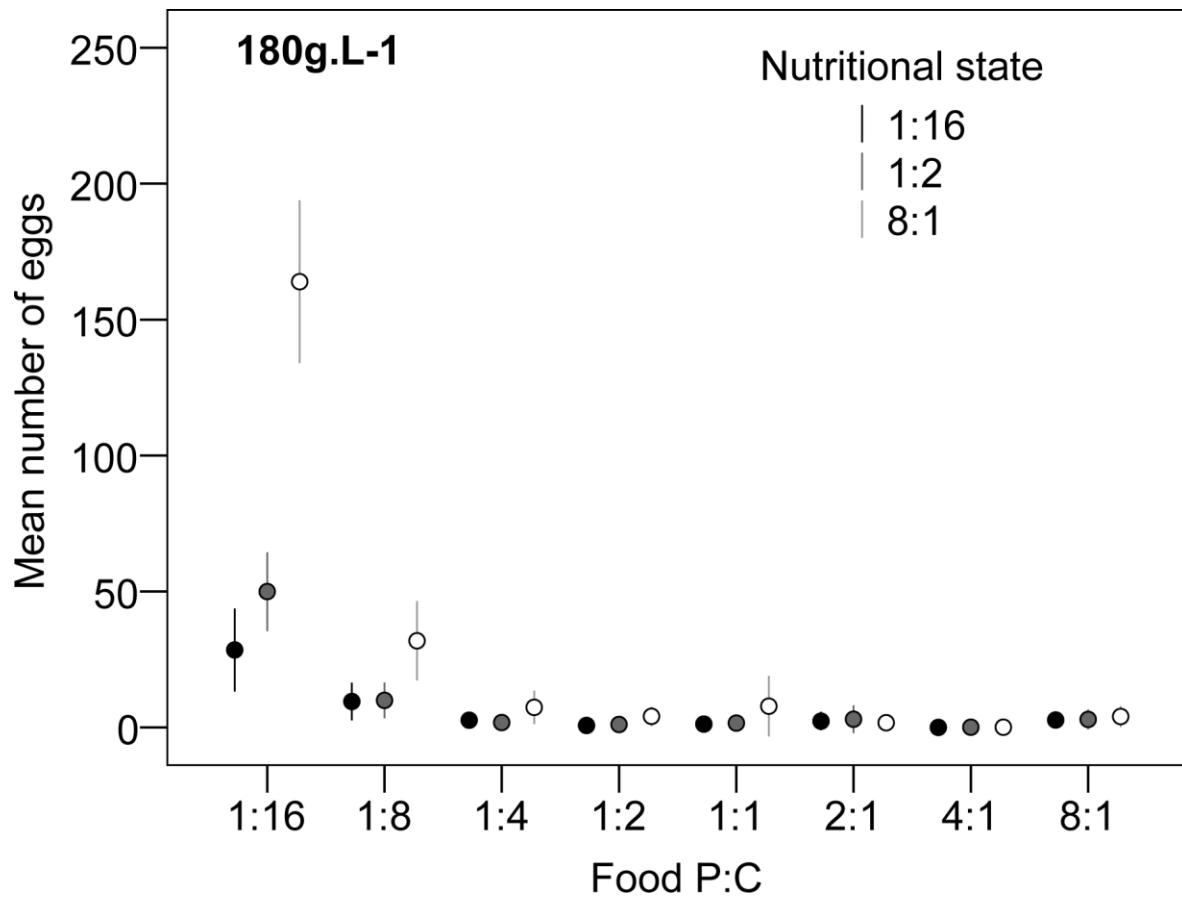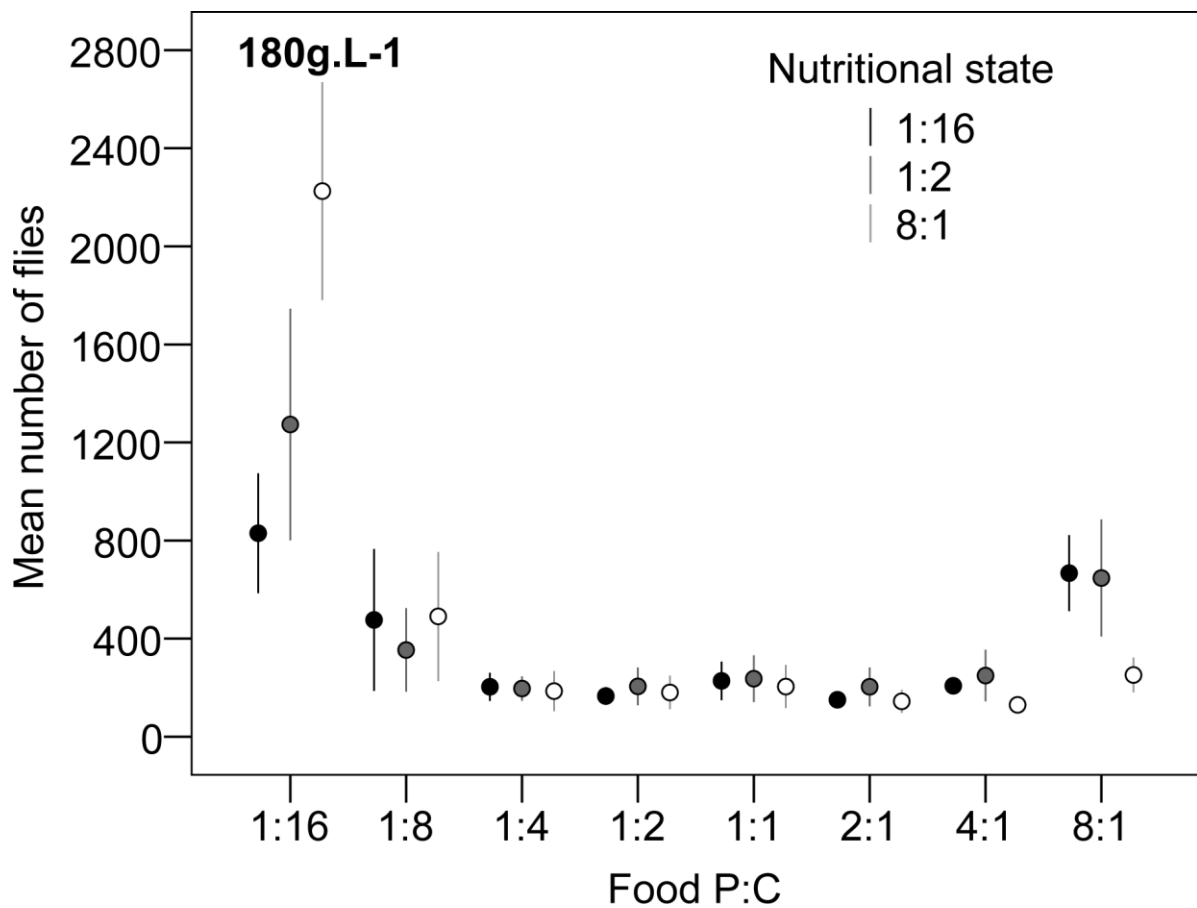

**Fig. S1. Effect of nutritional state on the interaction between feeding and egg-laying in choice assays (experiment 5).** Mean number of flies (A) and eggs (B) on each food according to the nutritional state of flies (N=18 groups for P:C 1:16, N=17 groups for P:C 1:2, N=19 groups for P:C 8:1). The P+C concentration was 180g.L<sup>-1</sup> for food. Flies were tested in groups of 10. Error bars indicate  $\pm$ 95% CI.

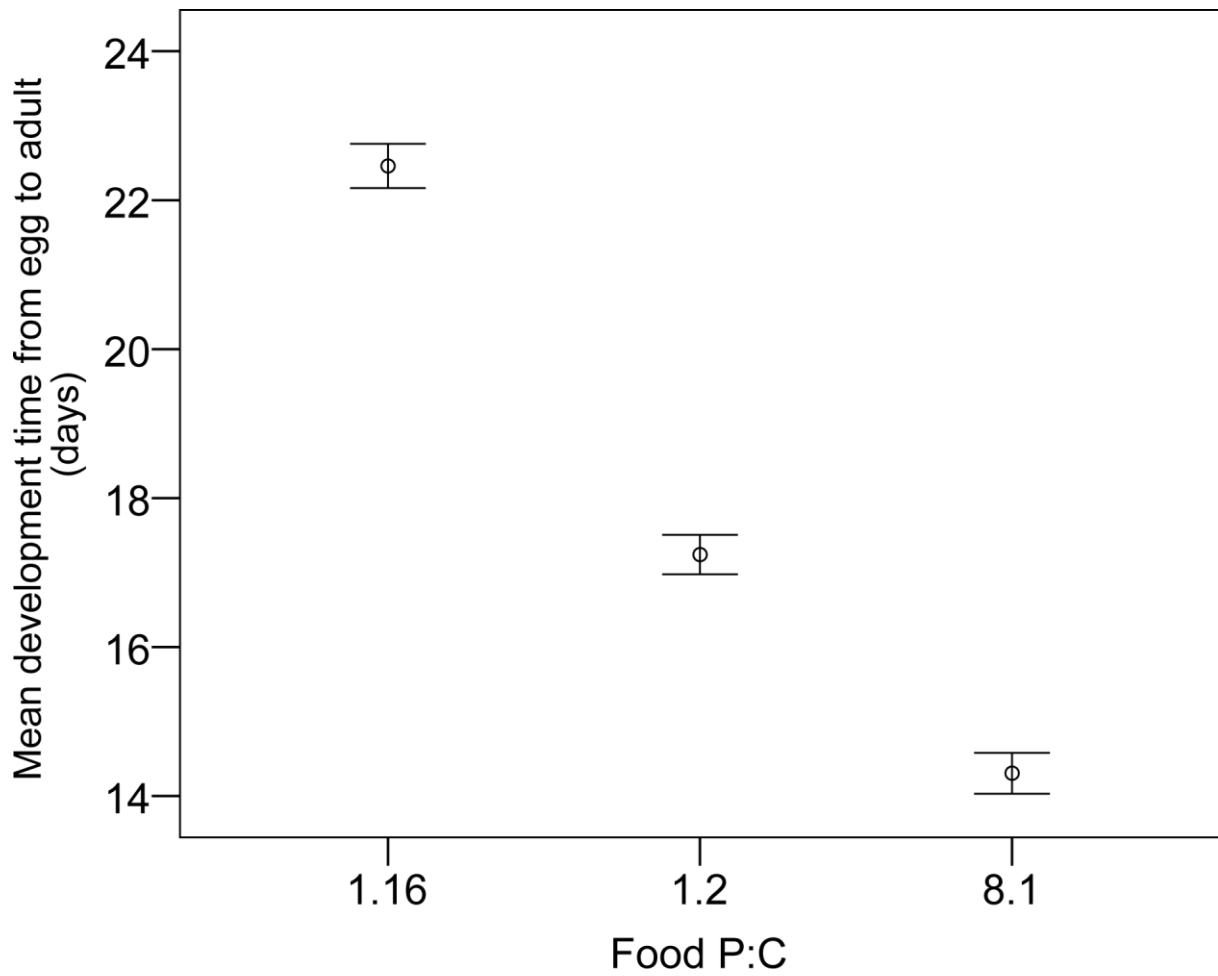

**Fig. S2. Effect of breeding diet on the development time from egg to adult (experiment 6).** Three protein to carbohydrate ratios (P:C) were tested. Flies were tested in groups of 5 (N=15 groups per food, N=1518 egg in total). Error bars indicate  $\pm 95\%$  CI.

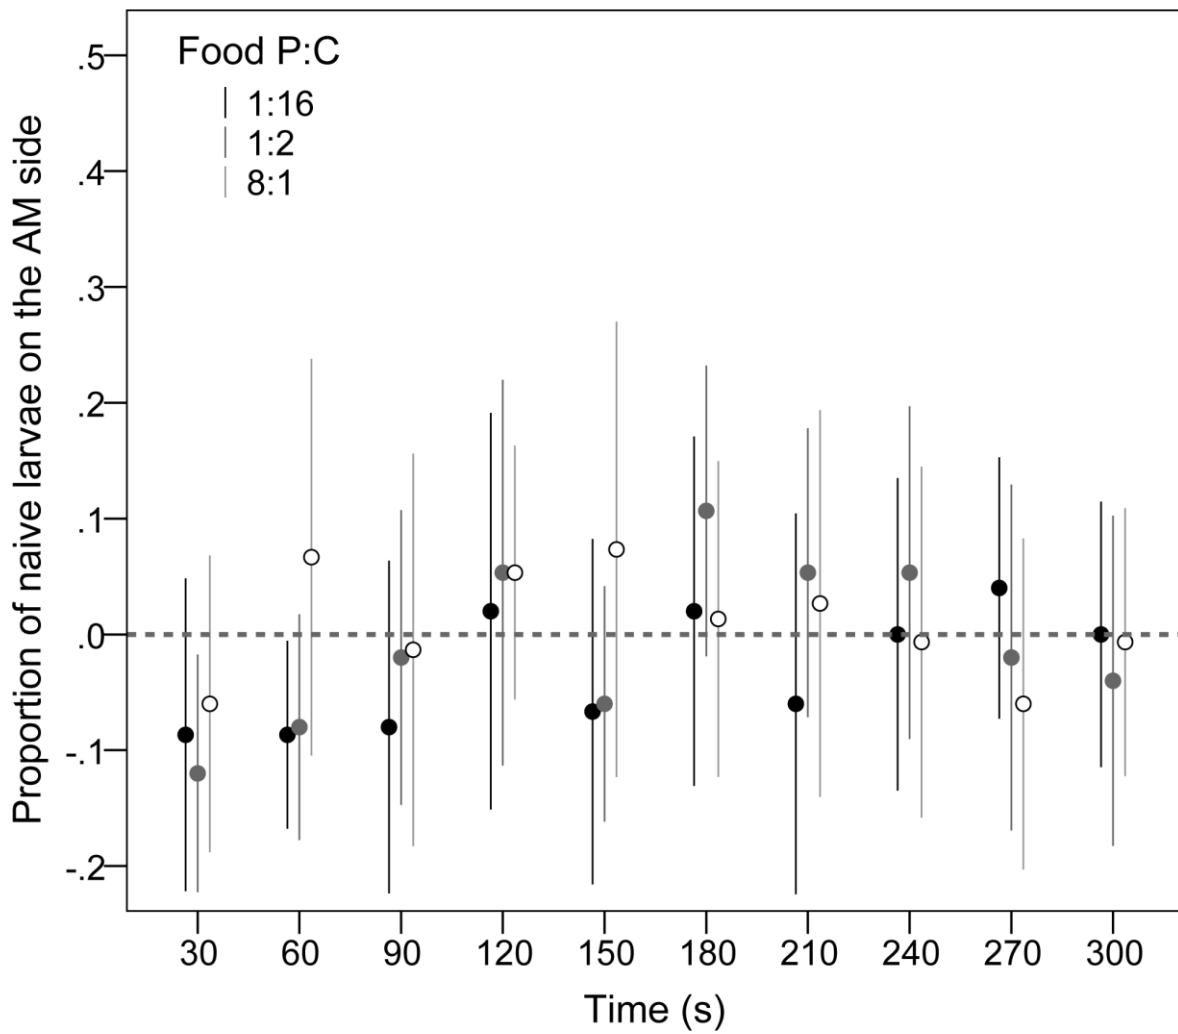

**Fig. S3. Effect of nutritional state on larval odour preference (experiment 7).** Proportion of larvae observed on the AM side after 3 minutes according to the nutritional state of flies (N=10 groups of 30 larvae for each nutritional state). Error bars indicate  $\pm 95\%$  CI.

**Table S1. Details of the experimental designs.** P:C is the protein to carbohydrate balance in diets. P+C is the total concentration of protein and carbohydrate (g.L<sup>-1</sup>). N is the number of replicates.

| Experiment | Breeding diet | Number of flies | Type of choice | Characteristics of food patches           |                                           | N  | Variable Recorded                   |                                  |
|------------|---------------|-----------------|----------------|-------------------------------------------|-------------------------------------------|----|-------------------------------------|----------------------------------|
|            |               |                 |                | P+C                                       | P:C                                       |    |                                     |                                  |
| Exp. 1     | Standard      | 1               | no choice      | 45                                        | 8:1                                       | 20 | Number of eggs                      |                                  |
|            | Standard      | 1               | no choice      | 45                                        | 4:1                                       | 20 |                                     |                                  |
|            | Standard      | 1               | no choice      | 45                                        | 1:1                                       | 20 |                                     |                                  |
|            | Standard      | 1               | no choice      | 45                                        | 1:2                                       | 20 |                                     |                                  |
|            | Standard      | 1               | no choice      | 45                                        | 1:4                                       | 20 |                                     |                                  |
|            | Standard      | 1               | no choice      | 45                                        | 1:6                                       | 20 |                                     |                                  |
|            | Standard      | 1               | no choice      | 45                                        | 1:8                                       | 20 |                                     |                                  |
|            | Standard      | 1               | no choice      | 90                                        | 8:1                                       | 20 |                                     |                                  |
|            | Standard      | 1               | no choice      | 90                                        | 4:1                                       | 20 |                                     |                                  |
|            | Standard      | 1               | no choice      | 90                                        | 2:1                                       | 20 |                                     |                                  |
|            | Standard      | 1               | no choice      | 90                                        | 1:1                                       | 20 |                                     |                                  |
|            | Standard      | 1               | no choice      | 90                                        | 1:2                                       | 20 |                                     |                                  |
|            | Standard      | 1               | no choice      | 90                                        | 1:4                                       | 20 |                                     |                                  |
|            | Standard      | 1               | no choice      | 90                                        | 1:8                                       | 20 |                                     |                                  |
|            | Standard      | 1               | no choice      | 90                                        | 1:16                                      | 20 |                                     |                                  |
|            | Standard      | 1               | no choice      | 180                                       | 8:1                                       | 28 |                                     |                                  |
|            | Standard      | 1               | no choice      | 180                                       | 4:1                                       | 37 |                                     |                                  |
|            | Standard      | 1               | no choice      | 180                                       | 2:1                                       | 37 |                                     |                                  |
|            | Standard      | 1               | no choice      | 180                                       | 1:1                                       | 37 |                                     |                                  |
|            | Standard      | 1               | no choice      | 180                                       | 1:2                                       | 37 |                                     |                                  |
|            | Standard      | 1               | no choice      | 180                                       | 1:4                                       | 37 |                                     |                                  |
|            | Standard      | 1               | no choice      | 180                                       | 1:8                                       | 37 |                                     |                                  |
|            | Standard      | 1               | no choice      | 180                                       | 1:16                                      | 37 |                                     |                                  |
|            | Standard      | 1               | no choice      | 180                                       | 1:32                                      | 20 |                                     |                                  |
|            | Standard      | 1               | no choice      | 270                                       | 8:1                                       | 20 |                                     |                                  |
|            | Standard      | 1               | no choice      | 270                                       | 4:1                                       | 20 |                                     |                                  |
|            | Standard      | 1               | no choice      | 270                                       | 2:1                                       | 20 |                                     |                                  |
|            | Standard      | 1               | no choice      | 270                                       | 1:1                                       | 20 |                                     |                                  |
| Standard   | 1             | no choice       | 270            | 1:2                                       | 20                                        |    |                                     |                                  |
| Standard   | 1             | no choice       | 270            | 1:4                                       | 20                                        |    |                                     |                                  |
| Standard   | 1             | no choice       | 270            | 1:8                                       | 20                                        |    |                                     |                                  |
| Standard   | 1             | no choice       | 270            | 1:16                                      | 20                                        |    |                                     |                                  |
| Standard   | 1             | no choice       | 270            | 1:32                                      | 20                                        |    |                                     |                                  |
| Standard   | 1             | no choice       | 270            | 1:56                                      | 20                                        |    |                                     |                                  |
| Exp. 2     | standard      | 1               | choice         | 180                                       | 8:1, 4:1, 2:1, 1:1, 1:2, 1:4, 1:8, 1:16   | 40 | Number of eggs                      |                                  |
|            | standard      | 10              | choice         | 180                                       |                                           | 24 |                                     |                                  |
| Exp. 3     | Standard      | 10              | choice         | 180                                       | 8:1, 4:1, 2:1, 1:1, 1:2, 1:4, 1:8, 1:16   | 21 | Number of eggs & Number of flies    |                                  |
| Exp. 4     | 8:1           | 1               | no choice      | 180                                       | Standard diet                             | 40 | Number of eggs                      |                                  |
|            | 1:2           | 1               | no choice      | 180                                       |                                           | 40 |                                     |                                  |
|            | 1:16          | 1               | no choice      | 180                                       |                                           | 40 |                                     |                                  |
|            | 8:1           | 10              | choice         | 45                                        | 8:1, 4:1, 2:1, 1:1, 1:2, 1:4, 1:6, 1:8    | 20 | Number of eggs                      |                                  |
|            | 8:1           | 10              | choice         | 90                                        | 8:1, 4:1, 2:1, 1:1, 1:2, 1:4, 1:8, 1:16   | 20 |                                     |                                  |
|            | 8:1           | 10              | choice         | 180                                       | 4:1, 2:1, 1:1, 1:2, 1:4, 1:8, 1:16, 1:32  | 20 |                                     |                                  |
|            | 8:1           | 10              | choice         | 270                                       | 2:1, 1:1, 1:2, 1:4, 1:8, 1:16, 1:32, 1:56 | 17 |                                     |                                  |
|            | 1:2           | 10              | choice         | 45                                        | 8:1, 4:1, 2:1, 1:1, 1:2, 1:4, 1:6, 1:8    | 20 |                                     |                                  |
|            | 1:2           | 10              | choice         | 90                                        | 8:1, 4:1, 2:1, 1:1, 1:2, 1:4, 1:8, 1:16   | 20 |                                     |                                  |
|            | 1:2           | 10              | choice         | 180                                       | 4:1, 2:1, 1:1, 1:2, 1:4, 1:8, 1:16, 1:32  | 19 |                                     |                                  |
|            | 1:2           | 10              | choice         | 270                                       | 2:1, 1:1, 1:2, 1:4, 1:8, 1:16, 1:32, 1:56 | 20 |                                     |                                  |
|            | 1:16          | 10              | choice         | 45                                        | 8:1, 4:1, 2:1, 1:1, 1:2, 1:4, 1:6, 1:8    | 20 |                                     |                                  |
|            | 1:16          | 10              | choice         | 90                                        | 8:1, 4:1, 2:1, 1:1, 1:2, 1:4, 1:8, 1:16   | 19 |                                     |                                  |
|            | 1:16          | 10              | choice         | 180                                       | 4:1, 2:1, 1:1, 1:2, 1:4, 1:8, 1:16, 1:32  | 20 |                                     |                                  |
| 1:16       | 10            | choice          | 270            | 2:1, 1:1, 1:2, 1:4, 1:8, 1:16, 1:32, 1:56 | 20                                        |    |                                     |                                  |
| Exp. 5     | 8:1           | 10              | choice         | 180                                       | 8:1, 4:1, 2:1, 1:1, 1:2, 1:4, 1:8, 1:16   | 19 |                                     | Number of eggs & Number of flies |
|            | 1:2           | 10              | choice         | 180                                       |                                           | 17 |                                     |                                  |
|            | 1:16          | 10              | choice         | 180                                       |                                           | 18 |                                     |                                  |
| Exp. 6     | standard      | 5               | no choice      | 180                                       | 8:1                                       | 15 | Number of eggs & Larval development |                                  |
|            | standard      | 5               | no choice      | 180                                       | 1:2                                       | 15 |                                     |                                  |
|            | standard      | 5               | no choice      | 180                                       | 1:16                                      | 15 |                                     |                                  |

**Table S2. Univariate response surface regression analyses testing the relationship between the nutrient concentration (protein and carbohydrate) and the number of eggs laid (experiment 1).** We used Lande–Arnold regressions to estimate parametric nonlinear response surfaces. These comprise linear and quadratic components for protein and carbohydrate intake and the cross-product of P and C. **A.** Tests of significance for the whole model. **B.** Estimated standardized coefficients. Significance: \*,  $P < 0.05$ ; \*\*,  $P < 0.01$ ; \*\*\*,  $P < 0.001$ .

**A**

|                | R <sup>2</sup> | F <sub>5,806</sub> | P      |
|----------------|----------------|--------------------|--------|
| Number of eggs | 0.19           | 38.17              | <0.001 |

**B**

|              | Linear $\beta$ (b) | Quadratic $\beta$ (b) | Correlational $\beta$ P $\times$ C (b) |
|--------------|--------------------|-----------------------|----------------------------------------|
| Protein      | 0.454 (0.098) **   | -0.368 (-0.0004) **   | -0.418 (-0.0012) ***                   |
| Carbohydrate | 1.800 (0.314) ***  | -1.508 (-0.0010) ***  |                                        |
